# Supplementary material for: Ocular examinations, findings, and toxicity in children taking vigabatrin
Source: PubMed Central journal article supplement (PMC10947413; doi:10.1016/j.jaapos.2022.05.001), 2022-07-08
Supplement: NIHMS1971170-supplement-supplemental.pdf [file NIHMS1971170-supplement-supplemental.pdf]

Schein Y, Miller KD, Han Y, Yu Y, de Alba Campomanes AG, Binenbaum G, Oatts JT. Ocular examinations, findings, and toxicity in children taking vigabatrin. J AAPOS online supplement.

eSupplement 1. Characteristics of six children with definite or possible vigabatrin toxicity

| Patient 1                           |                                                                                                                                                                                                                                                                                                                                                             |
|-------------------------------------|-------------------------------------------------------------------------------------------------------------------------------------------------------------------------------------------------------------------------------------------------------------------------------------------------------------------------------------------------------------|
| Toxicity                            | DEFINITE                                                                                                                                                                                                                                                                                                                                                    |
| Indication for vigabatrin           | Tuberous sclerosis, infantile spasms                                                                                                                                                                                                                                                                                                                        |
| Major comorbidities                 | Global developmental delay                                                                                                                                                                                                                                                                                                                                  |
| Age at vigabatrin initiation, years | 10.3                                                                                                                                                                                                                                                                                                                                                        |
| Vigabatrin duration, months         | 116.6                                                                                                                                                                                                                                                                                                                                                       |
| Total assessments                   | 12                                                                                                                                                                                                                                                                                                                                                          |
| ERG details                         | <ul style="list-style-type: none"> <li>• Had ERG because of reduced visual engagement concerns</li> <li>• ERG showed b-wave depression</li> <li>• Treating ophthalmologist attributed this to vigabatrin</li> </ul>                                                                                                                                         |
| Fundus details                      | <ul style="list-style-type: none"> <li>• Normal at the time of ERG</li> <li>• Pallor and vessels with slight attenuation, tortuosity 2 years later</li> </ul>                                                                                                                                                                                               |
| Visual acuity                       | No fix, no follow either eye                                                                                                                                                                                                                                                                                                                                |
| Reason for determining toxicity     | ERG with b-wave depression                                                                                                                                                                                                                                                                                                                                  |
| Outcome                             | <ul style="list-style-type: none"> <li>• Continued vigabatrin use despite ERG confirmed toxicity</li> <li>• Family and medical team agreed seizure control outweighed consequence of possible vision loss</li> </ul>                                                                                                                                        |
| Patient 2                           |                                                                                                                                                                                                                                                                                                                                                             |
| Toxicity                            | DEFINITE                                                                                                                                                                                                                                                                                                                                                    |
| Indication for vigabatrin           | Infantile spasms                                                                                                                                                                                                                                                                                                                                            |
| Major comorbidities                 | Congenital cerebral malformations right > left                                                                                                                                                                                                                                                                                                              |
| Age at vigabatrin initiation, years | 0.8                                                                                                                                                                                                                                                                                                                                                         |
| Vigabatrin duration, months         | 19.3                                                                                                                                                                                                                                                                                                                                                        |
| Total assessments                   | 2                                                                                                                                                                                                                                                                                                                                                           |
| ERG details                         | <ul style="list-style-type: none"> <li>• Reduction of a-wave and b-wave amplitudes</li> <li>• Treating ophthalmologist attributed this to vigabatrin</li> </ul>                                                                                                                                                                                             |
| Fundus details                      | Normal Discs and retinas                                                                                                                                                                                                                                                                                                                                    |
| Visual acuity                       | Fix and follow with both eyes (monocular testing not possible)                                                                                                                                                                                                                                                                                              |
| Reason for determining toxicity     | Reduction of a-wave and b-wave amplitudes                                                                                                                                                                                                                                                                                                                   |
| Outcome                             | <ul style="list-style-type: none"> <li>• Continued vigabatrin despite ERG-confirmed toxicity</li> <li>• Family and medical team agreed seizure control outweighed consequence of possible vision loss</li> </ul>                                                                                                                                            |
| Patient 3                           |                                                                                                                                                                                                                                                                                                                                                             |
| Toxicity                            | INCONCLUSIVE                                                                                                                                                                                                                                                                                                                                                |
| Indication for vigabatrin           | Intractable focal epilepsy                                                                                                                                                                                                                                                                                                                                  |
| Major comorbidities                 | Mitochondrial depletion syndrome, cerebellar atrophy                                                                                                                                                                                                                                                                                                        |
| Age at vigabatrin initiation, years | 3.7                                                                                                                                                                                                                                                                                                                                                         |
| Vigabatrin duration, months         | 125.2                                                                                                                                                                                                                                                                                                                                                       |
| Total assessments                   | 27                                                                                                                                                                                                                                                                                                                                                          |
| ERG details                         | No ERG performed                                                                                                                                                                                                                                                                                                                                            |
| Fundus details                      | <ul style="list-style-type: none"> <li>• Initially had a normal fundus exam</li> <li>• Over time developed mild optic atrophy, then moderate</li> </ul>                                                                                                                                                                                                     |
| Visual acuity                       | Fix and follow each eye                                                                                                                                                                                                                                                                                                                                     |
| Reason for determining toxicity     | Inconclusive because although the patient had worsening optic atrophy on exam, we could not rule out underlying cerebral atrophy as a cause                                                                                                                                                                                                                 |
| Outcome                             | Continued vigabatrin use despite optic atrophy; family and medical team agreed seizure control outweighed consequence of possible vision loss                                                                                                                                                                                                               |
| Patient 4                           |                                                                                                                                                                                                                                                                                                                                                             |
| Toxicity                            | INCONCLUSIVE                                                                                                                                                                                                                                                                                                                                                |
| Indication for vigabatrin           | Infantile spasms                                                                                                                                                                                                                                                                                                                                            |
| Major comorbidities                 | Chromosomal deletion in chromosome 16                                                                                                                                                                                                                                                                                                                       |
| Age at vigabatrin initiation, years | 0.9                                                                                                                                                                                                                                                                                                                                                         |
| Vigabatrin duration, months         | 10.5                                                                                                                                                                                                                                                                                                                                                        |
| Total assessments                   | 3                                                                                                                                                                                                                                                                                                                                                           |
| ERG details                         | <ul style="list-style-type: none"> <li>• No ERG performed</li> <li>• Documented conversation: "discussed ERG testing for vigabatrin, which would be difficult and likely abnormal due to vision impairment and difficult to interpret. Would only consider if parents are seeing changes in visual function or we see retinal changes over time"</li> </ul> |

Schein Y, Miller KD, Han Y, Yu Y, de Alba Campomanes AG, Binenbaum G, Oatts JT. Ocular examinations, findings, and toxicity in children taking vigabatrin. J AAPOS online supplement.

|                                     |                                                                                                                                                                                                                                                                                       |
|-------------------------------------|---------------------------------------------------------------------------------------------------------------------------------------------------------------------------------------------------------------------------------------------------------------------------------------|
| Fundus details                      | 2+ optic atrophy in both eyes                                                                                                                                                                                                                                                         |
| Visual acuity                       | CUSM each eye                                                                                                                                                                                                                                                                         |
| Reason for determining toxicity     | Inconclusive because although the patient had optic atrophy on exam after initiating vigabatrin, we could not rule out underlying comorbidities as a cause of this finding. The treating ophthalmologist thought the atrophy was likely related to central visual pathway abnormality |
| Outcome                             | Continued vigabatrin use despite optic atrophy; family and medical team agreed seizure control outweighed consequence of possible vision loss                                                                                                                                         |
| <hr/>                               |                                                                                                                                                                                                                                                                                       |
| Patient 5                           |                                                                                                                                                                                                                                                                                       |
| Toxicity                            | INCONCLUSIVE                                                                                                                                                                                                                                                                          |
| Indication for vigabatrin           | Perinatal brain injury causing seizures                                                                                                                                                                                                                                               |
| Major relevant comorbidities        | Prematurity with history of cerebral hemorrhage, periventricular leukomalacia, severe white matter volume loss with associated colpocephaly                                                                                                                                           |
| Age at vigabatrin initiation, years | 0.7                                                                                                                                                                                                                                                                                   |
| Vigabatrin duration, months         | 25.5                                                                                                                                                                                                                                                                                  |
| Total ophthalmic assessments        | 7                                                                                                                                                                                                                                                                                     |
| ERG details                         | No ERG performed                                                                                                                                                                                                                                                                      |
| Fundus details                      | Slight optic pallor and cupping in both eyes                                                                                                                                                                                                                                          |
| Visual acuity                       | UCUSUM each eye, no response to Teller cards                                                                                                                                                                                                                                          |
| Reason for determining toxicity     | Inconclusive because although the patient had optic pallor on exam after initiating vigabatrin, we could not rule out underlying comorbidities as a cause of this finding                                                                                                             |
| Outcome                             | Continued vigabatrin use despite optic atrophy; family and medical team agreed seizure control outweighed consequence of possible vision loss                                                                                                                                         |
| <hr/>                               |                                                                                                                                                                                                                                                                                       |
| Patient 6                           |                                                                                                                                                                                                                                                                                       |
| Toxicity                            | INCONCLUSIVE                                                                                                                                                                                                                                                                          |
| Indication for vigabatrin           | Tuberous sclerosis                                                                                                                                                                                                                                                                    |
| Major relevant comorbidities        | Scattered cortical tubers, worst in posterior lobes                                                                                                                                                                                                                                   |
| Age at vigabatrin initiation, years | 4.3                                                                                                                                                                                                                                                                                   |
| Vigabatrin duration, months         | 21.1                                                                                                                                                                                                                                                                                  |
| Total ophthalmic assessments        | 1                                                                                                                                                                                                                                                                                     |
| ERG details                         | No ERG performed                                                                                                                                                                                                                                                                      |
| Fundus details                      | 1+ optic nerve pallor in both eyes                                                                                                                                                                                                                                                    |
| Visual acuity                       | 20/40, 20/30 by LEA matching                                                                                                                                                                                                                                                          |
| Reason for determining toxicity     | Inconclusive because although the patient had optic pallor on exam after initiating vigabatrin, we could not rule out underlying comorbidities as a cause of this finding                                                                                                             |
| Outcome                             | Continued vigabatrin use despite optic atrophy; family and medical team agreed seizure control outweighed consequence of possible vision loss                                                                                                                                         |

*CUSM*, central unsteady maintained; *ERG*, electroretinogram; *UCUSUM*, uncentral unsteady unmaintained.
